# Supplementary material for: Screening of Antimicrobial Activity of Essential Oils against Bovine Respiratory Pathogens – Focusing on Pasteurella multocida
Source: PubMed Central journal article supplement — Planta Med. 2022 Feb 18;88(03-04):274–81. doi: 10.1055/a-1726-9291 (PMC8967432; doi:10.1055/a-1726-9291), 2022-02-18
Supplement: 10-1055-a-1726-9291-sup_pmf0238.pdf [file 10-1055-a-1726-9291-sup_pmf0238.pdf]

## Supplementary material

### Screening of Antimicrobial Activity of Essential Oils against Bovine Respiratory Pathogens - Focusing on *Pasteurella multocida*

Doris Bismarck<sup>1</sup>, Jens Becker<sup>2</sup>, Elisabeth Müller<sup>1</sup>, Vera Becher<sup>3</sup>, Lisa Nau<sup>3</sup>,  
Philipp Mayer<sup>3</sup>

#### Affiliations

<sup>1</sup>Laboklin GmbH & Co.KG, Bad Kissingen, Germany

<sup>2</sup>Clinic for Ruminants, Vetsuisse-Faculty, University of Bern, Bern, Switzerland

<sup>3</sup>SaluVet GmbH, Bad Waldsee, Germany

#### Correspondence

***Dr. Doris Bismarck***

Laboklin GmbH & CO.KG

Steubenstraße 4

97688 Bad Kissingen

Phone: +49 971 72020

Fax: +49 971 68546

bismarck@laboklin.com

Figure 1S

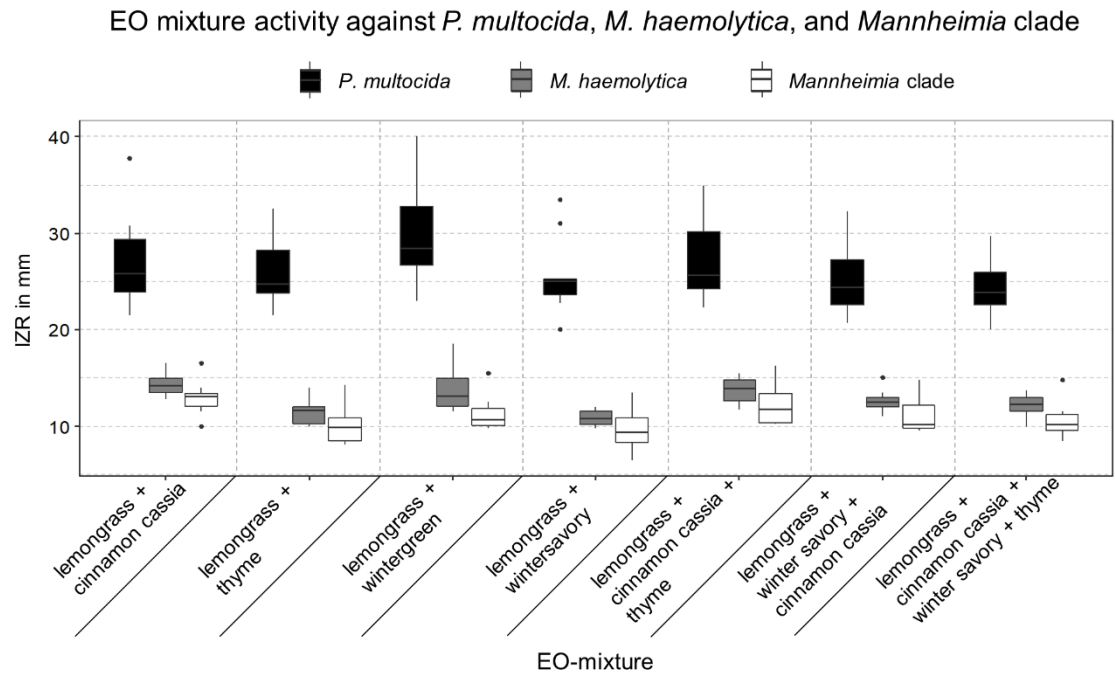

**Fig. 1S** Depicted is the inhibition zone radius (IZR) in mm of EO mixtures against *P. multocida* (n = 10), *M. haemolytica* (n = 10), and *Mannheimia* clade (n = 10). Multiple comparison with Benjamini-Hochberg adjustment of the main effects conducted after two-way ANOVA ( $F = 266.45$ ,  $df = 2, 189$ ,  $p < 0.001$ ) revealed *P. multocida* was more susceptible against the EO mixtures than *M. haemolytica* ( $p < 0.001$ ) and *Mannheimia* clade ( $p < 0.001$ ). *M. haemolytica* was more susceptible than *Mannheimia* clade ( $p < 0.001$ ).

Figure 2S

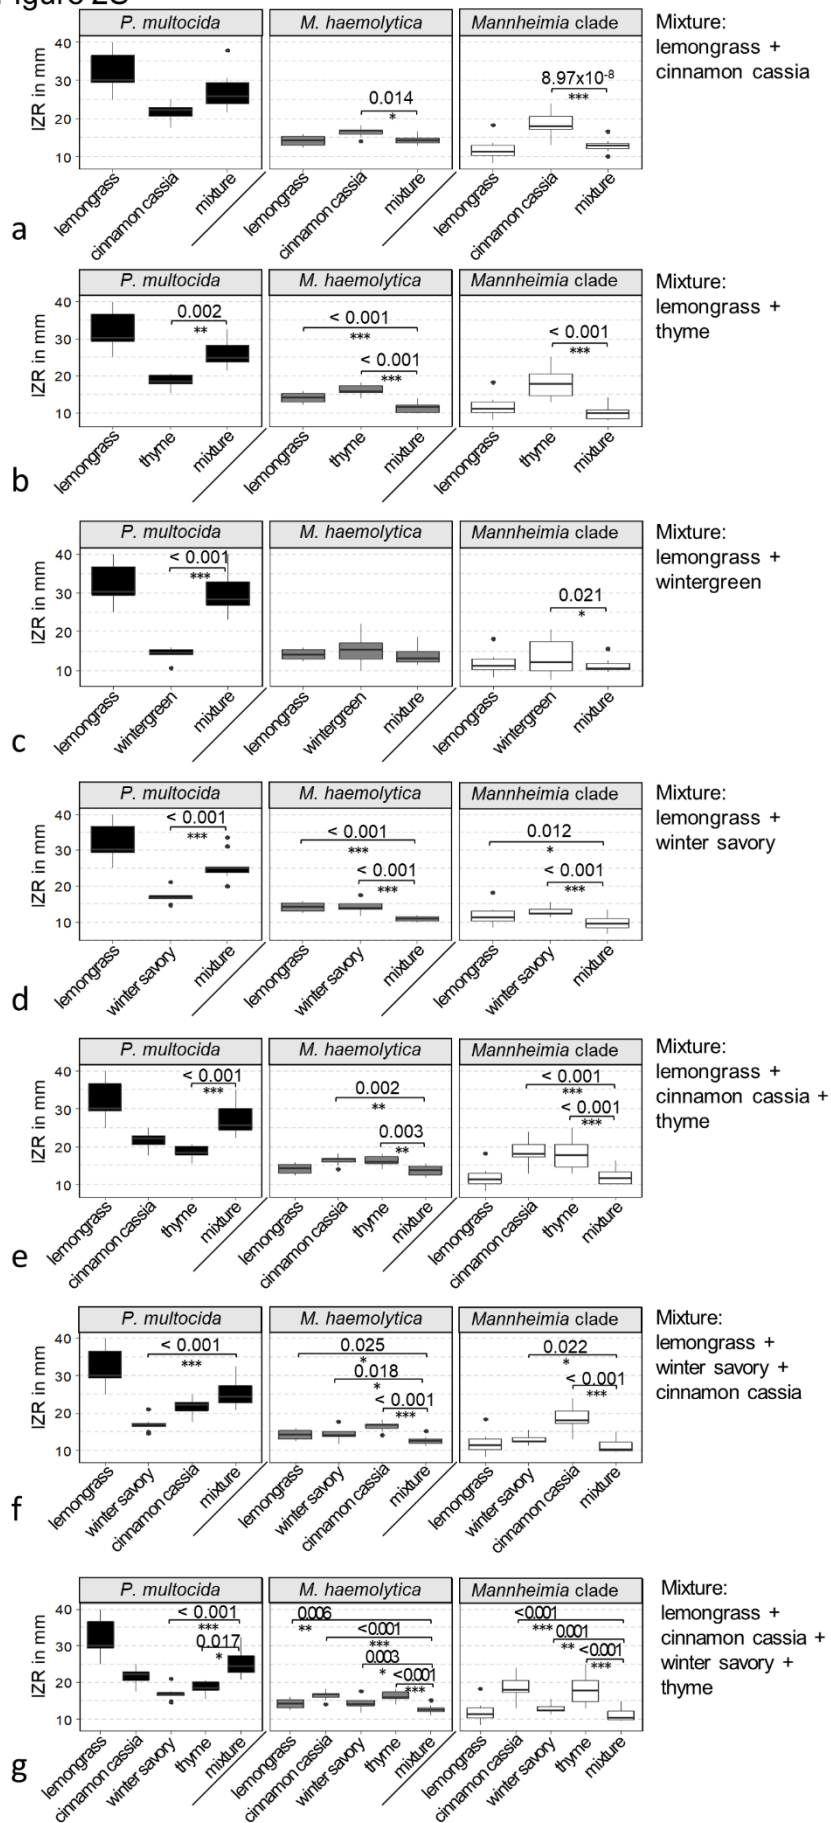

**Fig. 2S** Depicted is the inhibition zone radius (IZR) in mm of EO mixtures and their single EO constituents against *P. multocida* (n = 10), *M. haemolytica* (n = 10), and *Mannheimia* clade (n = 10). Only statistically significant results of comparison of antimicrobial activity of the EO mixture against single EO constituents are given. Conducted was a two-way ANOVA (interaction between the EO and bacterial isolate:  $F = 13.22$ ,  $df = 22, 324$ ,  $p < 0.001$ ) and post hoc pairwise comparison with Benjamini-Hochberg adjustment. P values of statistically significant differences and indicating asterisks (\* p value  $\leq 0.05$ , \*\* p value  $\leq 0.01$ , \*\*\* p value  $\leq 0.001$ ) are stated with the significance bars.
